# Supplementary material for: Global loss of cellular m 6 A RNA methylation following infection with different SARS-CoV-2 variants
Source: HighWire-hosted journal article supplement (doi:10.1101/gr.276407.121), 2023-03-01
Supplement: Supplemental_Data-S1.zip [file Supplemental Data S1-legend.docx]

**Supplemental Data S1:** Differentially expressed genes following SARS-CoV-2 infection in Vero and HBE cells
