# Supplementary material for: Global loss of cellular m 6 A RNA methylation following infection with different SARS-CoV-2 variants
Source: HighWire-hosted journal article supplement (doi:10.1101/gr.276407.121), 2023-03-01
Supplement: Supplemental_Data-S3.zip [file Supplemental Data S3-legend.docx]

**Supplemental Data S3:** m6A peaks in the SARS-CoV-2 viral genome and in the host genomes of non-infected and SARS-CoV-2 infected Vero, HBE, and HNE.
